# Supplementary material for: Identification and characterization of biomarkers associated with endoplasmic reticulum protein processing in cerebral ischemia-reperfusion injury
Source: PeerJ. 2024 Jan 2;12:e16707. doi: 10.7717/peerj.16707 (PMC10768662; doi:10.7717/peerj.16707)
Supplement: Supplemental Information 1 [file peerj-12-16707-s004.xlsx]

## Sheet: 引物序列
gene	Primer name	Sequence (5' -> 3')	Length	Tm	Location
ADCY5	Forward Primer	TCTCCTGCACCAACATCGTG	20	62.2	1157-1176
	Reverse Primer	CATGGCAACATGACGGGGA	19	62.4	1326-1308
CAMK2A	Forward Primer	GCTCTTCGAGGAATTGGGCAA	21	62.7	42-62
	Reverse Primer	CCTCTGAGATGCTGTCATGTAGT	23	61.2	244-222
PLCB1	Forward Primer	GGACTGACCCTCAGGGATTTT	21	61.1	131-151
	Reverse Primer	AAGCCACGAGATTCAAATGGG	21	60.6	364-344
NTRK2	Forward Primer	TCGTGGCATTTCCGAGATTGG	21	62.7	155-175
	Reverse Primer	TCGTCAGTTTGTTTCGGGTAAA	22	60.1	385-364
DLG4	Forward Primer	CACAACCTCTTATTCCCAGCAC	22	60.9	909-930
	Reverse Primer	CATGGCTGTGGGGTAGTCG	19	62.1	987-969
GAPDH	Forward Primer	GGAGCGAGATCCCTCCAAAAT	21	61.6	108-128
	Reverse Primer	GGCTGTTGTCATACTTCTCATGG	23	60.9	304-282

## Sheet: ADCY5
ADCY5								16.0841
	Sample name	Gene name	Three technical replicates			Ct average	△Ct	△△Ct	2-(△△Ct)
Mcao	cDNA1	GAPDH	14.64	12.953	14.445	14.0127	16.1248	0.0406696	0.972204
		ADCY5	30.0533	29.2281	31.1309	30.1374
	cDNA2	GAPDH	14.53	15.456	15.884	15.29	16.215	0.130949	0.913231
		ADCY5	31.564	31.2999	31.6513	31.505
	cDNA3	GAPDH	15.901	14.591	15.988	15.4933	15.8676	-0.216497	1.16191
		ADCY5	30.9118	29.2389	33.9321	31.3609
	cDNA4	GAPDH	14.23	14.953	14.445	14.5427	16.129	0.044878	0.969372
		ADCY5	31.0603	30.2389	30.7158	30.6716
Control	cDNA1	GAPDH	14.968	14.623	14.477	14.6893	15.1453	-0.93876	1.91688
		ADCY5	30.9436	31.6971	26.8632	29.8347
	cDNA2	GAPDH	14.615	15.457	15.802	15.2913	14.956	-1.1281	2.18571
		ADCY5	30.8058	29.8283	30.1078	30.2473
	cDNA3	GAPDH	14.27	14.046	14.698	14.338	15.2271	-0.85696	1.81122
		ADCY5	28.7091	28.6568	31.3295	29.5651
		GAPDH	14.73	14.953	14.445	14.7093	15.9623	-0.121789	1.08808
		ADCY5	31.0603	30.2389	30.7158	30.6716

## Sheet: CAMK2A
CAMK2A								16.4296
	Sample name	Gene name	Three technical replicates			Ct average	△Ct	△△Ct	2-(△△Ct)
Mcao	cDNA1	GAPDH	14.654	14.036	15.986	14.892	16.2424	-0.187249	1.13859
		CAMK2A	30.1982	31.6962	31.5087	31.1344
	cDNA2	GAPDH	14.988	14.856	14.059	14.6343	16.4177	-0.0118693	1.00826
		CAMK2A	30.6268	31.4289	31.1005	31.0521
	cDNA3	GAPDH	14.621	14.207	14.725	14.5177	16.8433	0.413651	0.750721
		CAMK2A	30.3603	31.7494	31.973	31.3609
	cDNA4	GAPDH	15.09	15.256	14.379	14.9083	16.2151	-0.214533	1.16033
		CAMK2A	31.2845	31.9199	30.1659	31.1234
Control	cDNA1	GAPDH	14.727	14.077	14.308	14.3707	15.8458	-0.583851	1.49885
		CAMK2A	29.9541	28.6121	32.0831	30.2164
	cDNA2	GAPDH	14.658	14.231	14.567	14.4853	15.9837	-0.445879	1.36214
		CAMK2A	31.1689	30.0262	30.2121	30.4691
	cDNA3	GAPDH	14.343	15.949	14.103	14.7983	15.5901	-0.839517	1.78945
		CAMK2A	30.2465	30.3389	30.5799	30.3884
		GAPDH	14.935	14.875	14.76	14.8567	15.9699	-0.459739	1.37529
		CAMK2A	30.9679	29.905	31.6067	30.8265

## Sheet: DLG4
DLG4								16.8123
	Sample name	Gene name	Three technical replicates			Ct average	△Ct	△△Ct	2-(△△Ct)
Mcao	cDNA1	GAPDH	14.886	14.26	14.496	14.5473	16.9218	0.109514	0.9269
		DLG4	31.7054	31.346	31.3561	31.4692
	cDNA2	GAPDH	14.391	14.593	14.303	14.429	16.6231	-0.189235	1.14016
		DLG4	30.086	31.6873	31.383	31.0521
	cDNA3	GAPDH	14.71	14.858	14.033	14.5337	16.8273	0.0149524	0.989689
		DLG4	32.3595	34.0453	27.678	31.3609
	cDNA4	GAPDH	14.212	14.538	14.989	14.5797	16.8771	0.064768	0.956099
		DLG4	30.5979	32.8965	30.8758	31.4567
Control	cDNA1	GAPDH	14.891	14.082	14.423	14.4653	16.571	-0.241344	1.18209
		DLG4	30.5428	30.5922	31.9738	31.0363
	cDNA2	GAPDH	14.927	14.045	14.523	14.4983	16.2509	-0.561403	1.4757
		DLG4	30.1209	27.1298	34.9971	30.7492
	cDNA3	GAPDH	14.032	14.49	14.525	14.349	16.5538	-0.258488	1.19622
		DLG4	30.8374	31.585	30.2861	30.9028
		GAPDH	14.512	14.084	14.549	14.3817	16.0816	-0.730734	1.65948
		DLG4	30.7854	29.223	31.3813	30.4632

## Sheet: NTRK2
NTRK2								16.3095
	Sample name	Gene name	Three technical replicates			Ct average	△Ct	△△Ct	2-(△△Ct)
Mcao	cDNA1	GAPDH	14.829	14.524	14.49	14.6143	16.3981	0.0885662	0.940457
		NTRK2	32.092	30.209	30.7364	31.0124
	cDNA2	GAPDH	14.254	14.811	14.527	14.5307	16.1881	-0.121474	1.08785
		NTRK2	30.7095	31.0246	30.4221	30.7187
	cDNA3	GAPDH	14.341	14.343	14.612	14.432	16.2623	-0.0472872	1.03332
		NTRK2	30.6732	30.5536	30.8559	30.6943
	cDNA4	GAPDH	14.615	14.514	14.072	14.4003	16.3897	0.0801951	0.94593
		NTRK2	30.6802	31.5703	30.1197	30.7901
Control	cDNA1	GAPDH	14.953	14.775	14.383	14.7037	16.0107	-0.298845	1.23016
		NTRK2	30.9487	30.0419	31.1525	30.7144
	cDNA2	GAPDH	14.51	14.832	14.523	14.6217	15.6947	-0.614845	1.53139
		NTRK2	31.0862	29.1437	30.7191	30.3164
	cDNA3	GAPDH	14.794	14.795	14.534	14.7077	15.8271	-0.482404	1.39707
		NTRK2	30.173	31.1656	30.2658	30.5348
		GAPDH	14.247	14.664	14.615	14.5087	16.2879	-0.0216404	1.01511
		NTRK2	31.1688	30.1808	31.0402	30.7966

## Sheet: PLCB1
PLCB1								16.2967
	Sample name	Gene name	Three technical replicates			Ct average	△Ct	△△Ct	2-(△△Ct)
MCAO	cDNA1	GAPDH	14.908	14.589	14.592	14.6963	16.1062	-0.190544	1.14119
		PLCB1	30.5577	30.1229	31.7269	30.8025
	cDNA2	GAPDH	14.38	14.723	14.171	14.4247	16.056	-0.240728	1.18159
		PLCB1	30.8473	30.1285	30.466	30.4806
	cDNA3	GAPDH	14.997	14.992	14.35	14.7797	16.5813	0.284561	0.820991
		PLCB1	31.0724	30.6963	32.314	31.3609
	cDNA4	GAPDH	14.174	14.774	14.092	14.3467	16.4434	0.14671	0.903308
		PLCB1	29.4235	29.1728	33.7739	30.7901
Control	cDNA1	GAPDH	14.072	14.29	14.967	14.443	15.9303	-0.366367	1.2891
		PLCB1	28.3625	29.984	32.7735	30.3733
	cDNA2	GAPDH	14.736	14.159	14.511	14.4687	15.4327	-0.864034	1.82012
		PLCB1	30.0691	30.2779	29.357	29.9013
	cDNA3	GAPDH	14.906	14.053	14.554	14.5043	15.4323	-0.864439	1.82063
		PLCB1	30.6303	27.7392	31.4403	29.9366
		GAPDH	14.528	14.159	14.373	14.3533	15.0556	-1.24115	2.36387
		PLCB1	30.1897	29.2742	28.7628	29.4089
