# Supplementary material for: Identification and characterization of biomarkers associated with endoplasmic reticulum protein processing in cerebral ischemia-reperfusion injury
Source: PeerJ. 2024 Jan 2;12:e16707. doi: 10.7717/peerj.16707 (PMC10768662; doi:10.7717/peerj.16707)
Supplement: Supplemental Information 2 [file peerj-12-16707-s006.xls]

## Sheet: Sheet1
ITEM TO CHECK	IMPORTANCE	CHECKLIST
EXPERIMENTAL DESIGN
Definition of experimental and control groups	E	P3,L104-108
Number within each group	E	P3,L100-108
Assay carried out by core lab or investigator's lab?	D	P3,L100-108
Acknowledgement of authors' contributions	D	P6, L224-225
SAMPLE
Description	E
Volume/mass of sample processed	D	P3,L100-108
Microdissection or macrodissection	E	P3,L100-108
Processing procedure	E
If frozen - how and how quickly?	E	P3,L100-108
If fixed - with what, how quickly?	E	P3,L100-108
Sample storage conditions and duration (especially for FFPE samples)	E	P3,L100-108
NUCLEIC ACID EXTRACTION
Procedure and/or instrumentation	E
Name of kit and details of any modifications	E	P3, L109-118
Source of additional reagents used	D	P3, L109-118
Details of DNase or RNAse treatment	E	P3, L109-118
Contamination assessment (DNA or RNA)	E	P3, L109-118
Nucleic acid quantification	E
Instrument and method	E	P3, L109-118
Purity (A260/A280)	D	P3, L109-118
Yield	D	P3, L109-118
RNA integrity method/instrument	E
RIN/RQI or Cq of 3' and 5' transcripts	E	P3, L109-118
Electrophoresis traces	D	P3, L109-118
Inhibition testing (Cq dilutions, spike or other)	E	P3, L109-118
REVERSE TRANSCRIPTION
Complete reaction conditions	E
Amount of RNA and reaction volume	E	P3, L109-118
Priming oligonucleotide (if using GSP) and concentration	E	P3, L109-118
Reverse transcriptase and concentration	E	P3, L109-118
Temperature and time	E	P3, L109-118
Manufacturer of reagents and catalogue numbers	D	P3, L109-118
Cqs with and without RT	D*	P3, L109-118
Storage conditions of cDNA	D	P3, L109-118
qPCR TARGET INFORMATION
If multiplex, efficiency and LOD of each assay.	E	N/A.
Sequence accession number	E	P3, L118
Location of amplicon	D	P3, L118
Amplicon length	E
In silico specificity screen (BLAST, etc)	E	P3, L109-118
Pseudogenes, retropseudogenes or other homologs?	D	P3, L109-118
Sequence alignment	D	P3, L109-118
Secondary structure analysis of amplicon	D	P3, L109-118
Location of each primer by exon or intron (if applicable)	E
What splice variants are targeted?	E	N/A.
qPCR OLIGONUCLEOTIDES
Primer sequences	E	P3, L118
RTPrimerDB Identification Number	D	P3, L109-118
Probe sequences	D**	P3, L118
Location and identity of any modifications	E	P3, L109-118
Manufacturer of oligonucleotides	D	P3, L109-118
Purification method	D	P3, L109-118
qPCR PROTOCOL
Complete reaction conditions	E
Reaction volume and amount of cDNA/DNA	E	P3, L109-118
Primer, (probe), Mg++ and dNTP concentrations	E	P3, L109-118
Polymerase identity and concentration	E	P3, L109-118
Buffer/kit identity and manufacturer	E	P3, L109-118
Exact chemical constitution of the buffer	D	P3, L109-118
Additives (SYBR Green I, DMSO, etc.)	E	P3, L109-118
Manufacturer of plates/tubes and catalog number	D	P3, L109-118
Complete thermocycling parameters	E	P3, L109-118
Reaction setup (manual/robotic)	D	P3, L109-118
Manufacturer of qPCR instrument	E	P3, L109-118
qPCR VALIDATION
Evidence of optimisation (from gradients)	D	P3, L109-118
Specificity (gel, sequence, melt, or digest)	E	P3, L109-118
For SYBR Green I, Cq of the NTC	E	P3, L109-118
Standard curves with slope and y-intercept	E	P3, L109-118
PCR efficiency calculated from slope	E	P3, L109-118
Confidence interval for PCR efficiency or standard error	D	P3, L109-118
r2 of standard curve	E	P3, L109-118
Linear dynamic range	E	P3, L109-118
Cq variation at lower limit	E	P3, L109-118
Confidence intervals throughout range	D	P3, L109-118
Evidence for limit of detection	E	P3, L109-118
If multiplex, efficiency and LOD of each assay.	E	N/A.
DATA ANALYSIS
qPCR analysis program (source, version)	E
Cq method determination	E	P3, L109-118
Outlier identification and disposition	E	P3, L109-118
Results of NTCs	E	P3, L109-118
Justification of number and choice of reference genes	E	P3, L109-118
Description of normalisation method	E	P3, L109-118
Number and concordance of biological replicates	D	P3, L109-118
Number and stage (RT or qPCR) of technical replicates	E	P3, L109-118
Repeatability (intra-assay variation)	E	P3, L109-118
Reproducibility (inter-assay variation, %CV)	D	P3, L109-118
Power analysis	D	P3, L109-118
Statistical methods for result significance	E	P3, L109-118
Software (source, version)	E	P3, L109-118
Cq or raw data submission using RDML	D	P3, L109-118
Table 1. MIQE checklist for authors, reviewers and editors. All essential information (E) must be submitted with the manuscript. Desirable
information (D) should be submitted if available. If using primers obtained from RTPrimerDB, information on qPCR target, oligonucleotides,
protocols and validation is available from that source.
*: Assessing the absence of DNA using a no RT assay is essential when first extracting RNA. Once the sample has been validated as
RDNA-free, inclusion of a no-RT control is desirable, but no longer essential.
**: Disclosure of the probe sequence is highly desirable and strongly encouraged. However, since not all commercial pre-designed assay
vendors provide this information, it cannot be an essential requirement. Use of such assays is advised against.
