# Supplementary material for: Identification and characterization of biomarkers associated with endoplasmic reticulum protein processing in cerebral ischemia-reperfusion injury
Source: PeerJ journal article supplement (doi:10.7717/peerj.16707), 2024-01-02

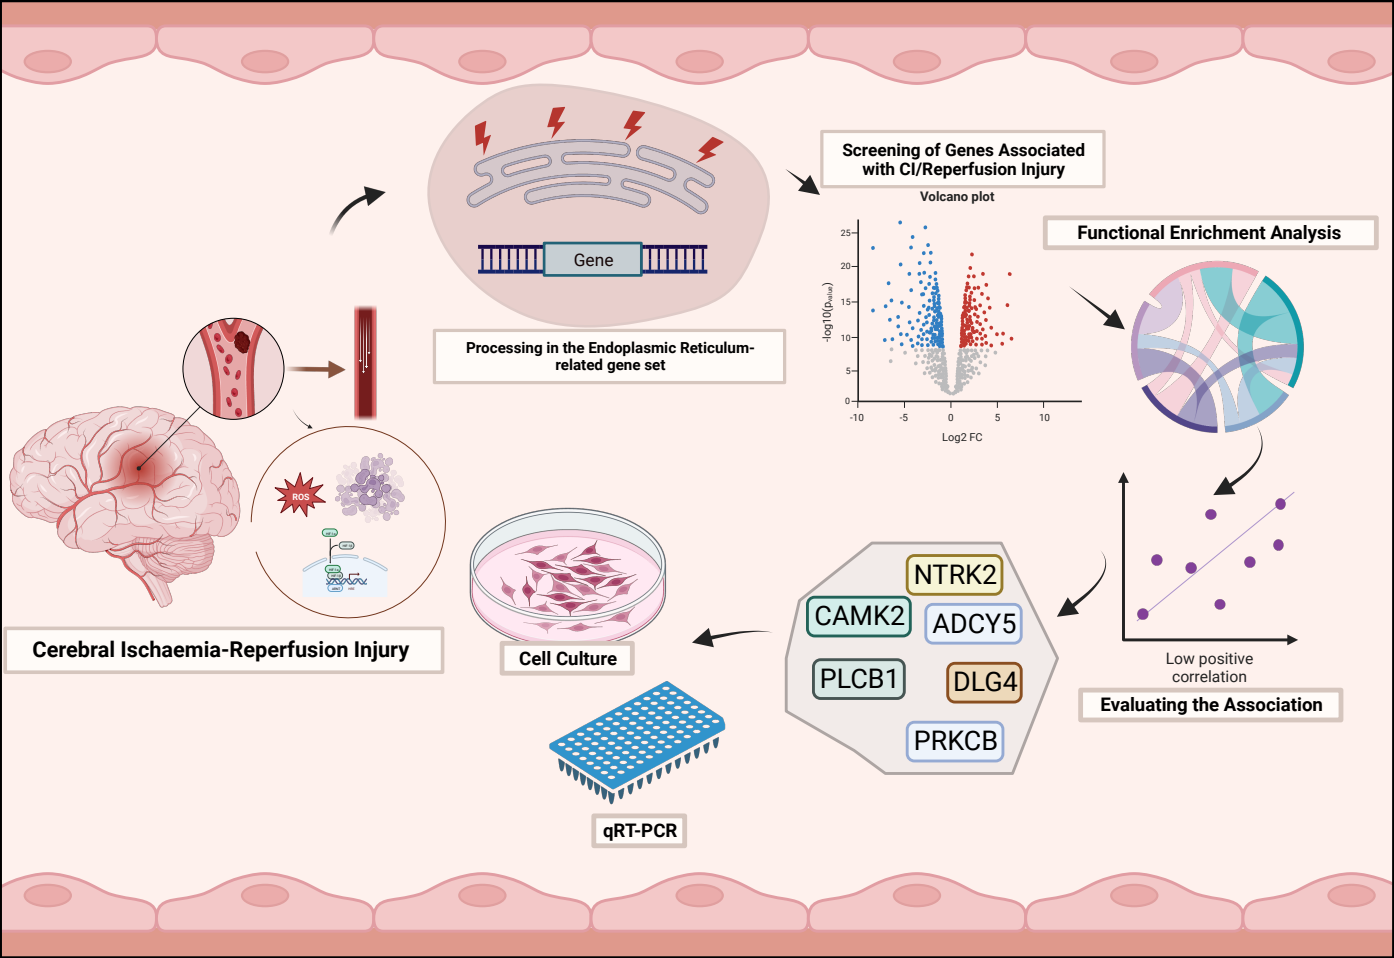

Supplement: Supplementary_Fig._1.pdf [file Supplementary_Fig._1.pdf]
