# Supplementary material for: Identification and characterization of biomarkers associated with endoplasmic reticulum protein processing in cerebral ischemia-reperfusion injury
Source: PeerJ. 2024 Jan 2;12:e16707. doi: 10.7717/peerj.16707 (PMC10768662; doi:10.7717/peerj.16707)
Supplement: Table S3 [file peerj-12-16707-s005.xlsx]

## Sheet: Sheet1
Supplementary Table 3 Top 10 entries in the each enrichment analysis
ONTOLOGY	ID	Description	GeneRatio	BgRatio	pvalue	p.adjust	qvalue	Count
BP	GO:0050900	leukocyte migration	66/1025	376/17840	2.69e-16	1.54e-12	1.11e-12	66
BP	GO:0002685	regulation of leukocyte migration	46/1025	227/17840	4.54e-14	1.29e-10	9.35e-11	46
BP	GO:0042060	wound healing	65/1025	431/17840	7.42e-13	1.41e-09	1.02e-09	65
BP	GO:0045765	regulation of angiogenesis	50/1025	299/17840	7.74e-12	1.1e-08	7.97e-09	50
BP	GO:1901342	regulation of vasculature development	50/1025	303/17840	1.28e-11	1.46e-08	1.05e-08	50
BP	GO:0008360	regulation of cell shape	32/1025	149/17840	6.86e-11	6.52e-08	4.71e-08	32
BP	GO:0097529	myeloid leukocyte migration	40/1025	222/17840	9.59e-11	7.81e-08	5.64e-08	40
BP	GO:0030595	leukocyte chemotaxis	40/1025	225/17840	1.46e-10	9.07e-08	6.55e-08	40
BP	GO:0001505	regulation of neurotransmitter levels	45/1025	274/17840	1.61e-10	9.07e-08	6.55e-08	45
BP	GO:0002687	positive regulation of leukocyte migration	32/1025	154/17840	1.7e-10	9.07e-08	6.55e-08	32
CC	GO:0098984	neuron to neuron synapse	65/1025	458/18212	4.88e-12	1.15e-09	8.58e-10	65
CC	GO:0045121	membrane raft	60/1025	407/18212	6.64e-12	1.15e-09	8.58e-10	60
CC	GO:0098857	membrane microdomain	60/1025	408/18212	7.37e-12	1.15e-09	8.58e-10	60
CC	GO:0032279	asymmetric synapse	62/1025	430/18212	7.75e-12	1.15e-09	8.58e-10	62
CC	GO:0014069	postsynaptic density	61/1025	424/18212	1.26e-11	1.32e-09	9.9e-10	61
CC	GO:0031252	cell leading edge	62/1025	437/18212	1.56e-11	1.32e-09	9.9e-10	62
CC	GO:0099572	postsynaptic specialization	64/1025	459/18212	1.56e-11	1.32e-09	9.9e-10	64
CC	GO:0022626	cytosolic ribosome	31/1025	146/18212	1.11e-10	7.52e-09	5.63e-09	31
CC	GO:0015629	actin cytoskeleton	65/1025	492/18212	1.14e-10	7.52e-09	5.63e-09	65
CC	GO:0097060	synaptic membrane	62/1025	466/18212	2.33e-10	1.38e-08	1.03e-08	62
MF	GO:0050839	cell adhesion molecule binding	50/979	280/16507	1.9e-12	1.84e-09	1.58e-09	50
MF	GO:0005178	integrin binding	32/979	137/16507	1.45e-11	7.04e-09	6.05e-09	32
MF	GO:0003779	actin binding	55/979	417/16507	1.98e-08	6.4e-06	5.5e-06	55
MF	GO:0060589	nucleoside-triphosphatase regulator activity	55/979	440/16507	1.24e-07	3.01e-05	2.59e-05	55
MF	GO:0030695	GTPase regulator activity	50/979	401/16507	5.02e-07	9.76e-05	8.39e-05	50
MF	GO:0005516	calmodulin binding	28/979	176/16507	1.64e-06	0.00026575	0.000228457	28
MF	GO:0035254	glutamate receptor binding	15/979	66/16507	5.49e-06	0.000761287	0.000654454	15
MF	GO:0005539	glycosaminoglycan binding	30/979	216/16507	1.2e-05	0.00145591	0.0012516	30
MF	GO:0060090	molecular adaptor activity	38/979	311/16507	1.85e-05	0.00199404	0.00171421	38
MF	GO:0005096	GTPase activator activity	29/979	220/16507	4.47e-05	0.00434333	0.00373382	29
KEGG	rno05171	Coronavirus disease - COVID-19	49/558	318/8963	2.33e-09	7.31e-07	4.95e-07	49
KEGG	rno04015	Rap1 signaling pathway	34/558	213/8963	3.07e-07	4.66e-05	3.16e-05	34
KEGG	rno05030	Cocaine addiction	14/558	47/8963	5.63e-07	4.66e-05	3.16e-05	14
KEGG	rno05417	Lipid and atherosclerosis	33/558	209/8963	5.94e-07	4.66e-05	3.16e-05	33
KEGG	rno04064	NF-kappa B signaling pathway	20/558	98/8963	1.92e-06	0.000120505	8.16e-05	20
KEGG	rno04670	Leukocyte transendothelial migration	22/558	117/8963	2.52e-06	0.000132096	8.95e-05	22
KEGG	rno05146	Amoebiasis	19/558	96/8963	5.58e-06	0.000234838	0.000159025	19
KEGG	rno04724	Glutamatergic synapse	21/558	114/8963	5.98e-06	0.000234838	0.000159025	21
KEGG	rno05133	Pertussis	16/558	73/8963	7.81e-06	0.000272521	0.000184543	16
KEGG	rno05163	Human cytomegalovirus infection	34/558	248/8963	1.03e-05	0.000324218	0.000219551	34
